# Supplementary material
Source: ML conference proceedings conference paper supplement (https://openreview.net/forum?id=yB5L6ryIkb)
Supplement: supplementary_material [file ice_joint.pdf › supplementary_materials/fnope_code/plots/ice_plots/ice_joint.pdf]

**a**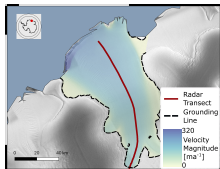**b**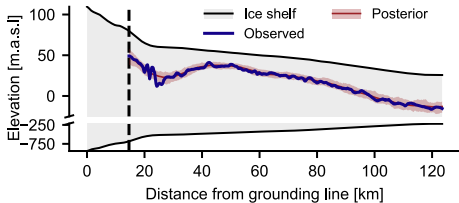**c**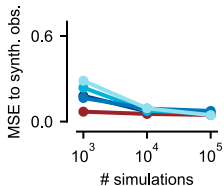**d**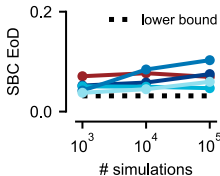**e**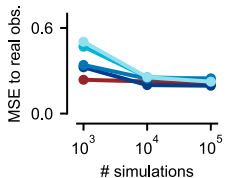

Legend for panels c, d, and e:

- FNOPE (red line with diamond markers)
- NPE (spectral) (blue line with diamond markers)
- FMPE (spectral) (cyan line with diamond markers)
- NPE (raw) (light blue line with diamond markers)
- FMPE (raw) (dark blue line with diamond markers)
