# Supplementary material
Source: ML conference proceedings conference paper supplement (https://openreview.net/forum?id=yB5L6ryIkb)

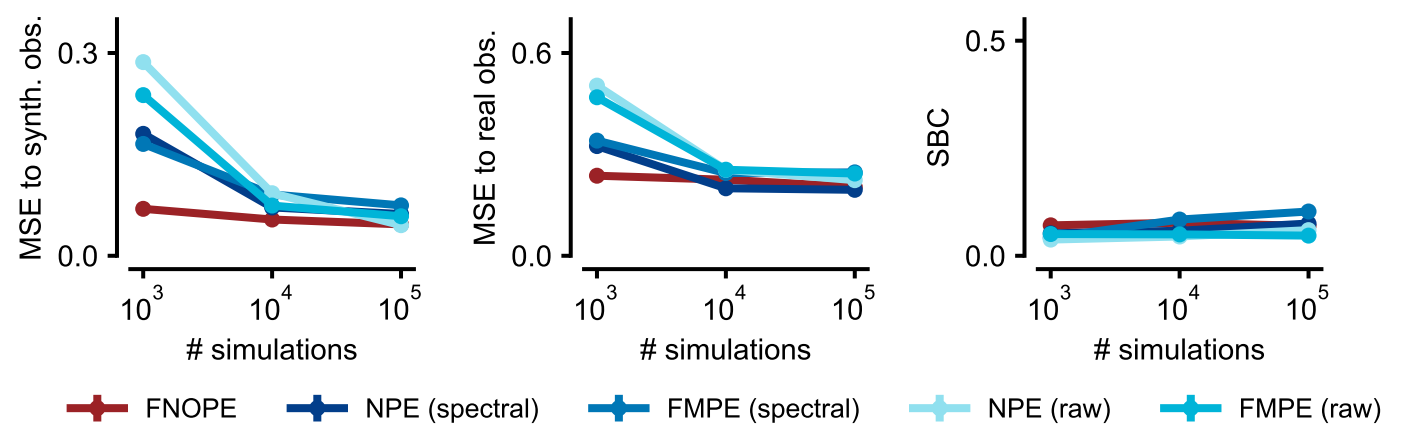

Supplement: supplementary_material [file results_ice.pdf › supplementary_materials/fnope_code/plots/ice_plots/results_ice.pdf]

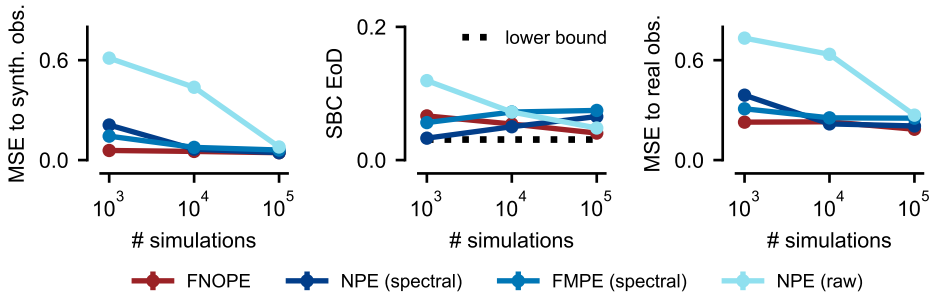

Supplement: supplementary_material [file results_ice_500.pdf › supplementary_materials/fnope_code/plots/ice_plots/results_ice_500.pdf]

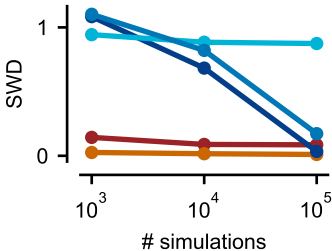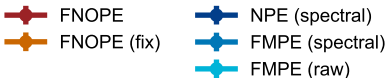

Supplement: supplementary_material [file results_linearGaussian_v0.pdf › supplementary_materials/fnope_code/plots/linear_gaussian_plots/results_linearGaussian_v0.pdf]
